# Supplementary material
Source: Springer Nature journal article supplement (https://www.springermedizin.de/resource/supplementary/12963_2010_133_MOESM7_ESM.pdf/9572732)

a. Males

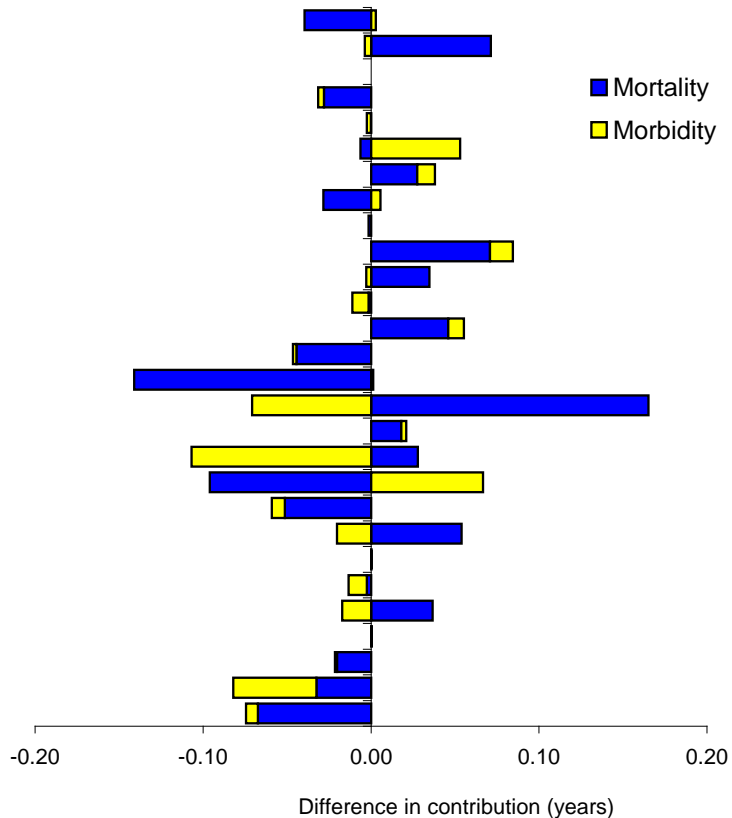

b. Females

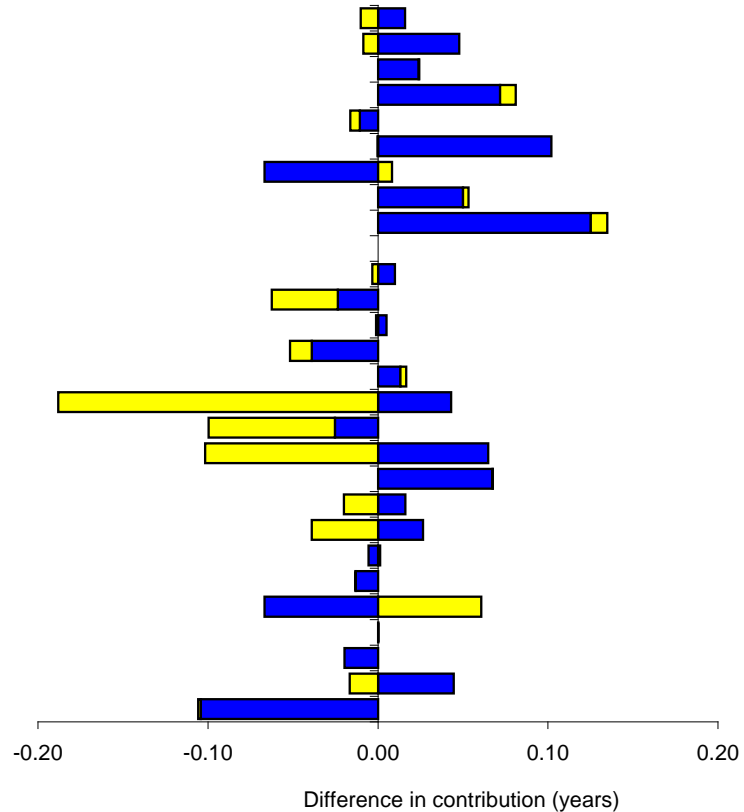

Supplement: MOESM7 [file 9572732]
